# Supplementary material for: Association of Obesity With Mortality Over 24 Years of Weight History: Findings From the Framingham Heart Study
Source: PubMed Central journal article supplement (PMC6324399; doi:10.1001/jamanetworkopen.2018.4587), 2018-11-16
Supplement: jamanetwopen-1-e184587-s001.pdf [file jamanetwopen-1-e184587-s001.pdf]

## Supplementary Online Content

Xu H, Cupples LA, Stokes A, Liu C-T. Association of obesity with mortality over 24 years of weight history: findings from the Framingham Heart Study. *JAMA Netw Open*. 2018;1(7):e184587. doi:10.1001/jamanetworkopen.2018.4587

**eFigure 1.** Flowchart of Sample Exclusion

**eFigure 2.** Hazard Ratios for Categories of Maximum BMI With 24 Years of Weight History and Baseline BMI Among Both All Individuals and Never Smokers

**eTable 1.** Characteristics of Prior Conditions Among BMI Categories

**eTable 2.** Analysis of Trends in the Mortality Risks Between FHS Original and Offspring Cohorts for Overweight and Obesity Categories of Maximum BMI

**eTable 3.** Hazard Ratios for All-Cause Mortality in the FHS Original and Offspring Cohorts for Maximum BMI Categories With 24 Years of Weight History, Stratified by Smoking Status, Sex, and Cohort

**eTable 4.** Hazard Ratios for All-Cause Mortality in the FHS Original and Offspring Cohorts for Maximum BMI Categories With 24 Years of Weight History and BMI Categories at Baseline Exam, Stratified by Age of 70 at Baseline

**eTable 5.** Hazard Ratios for All-Cause Mortality in the FHS Original and Offspring Cohorts for Maximum BMI Categories With 24 Years of Weight History, Stratified by Smoking Status and Sex, Further Adjusting for BMI at Baseline Exam as Sensitivity Analyses

**eTable 6.** Sample Size and Hazard Ratios for All-Cause Mortality for FHS Original and Offspring Cohorts Stratified by Maximum BMI and Baseline BMI Among All Individuals

**eTable 7.** Hazard Ratios for Cause-Specific Mortality in the FHS Original and Offspring Cohorts for Maximum BMI Categories With 24 Years of Weight History

This supplementary material has been provided by the authors to give readers additional information about their work.

**eFigure 1.** Flowchart of Sample Exclusion

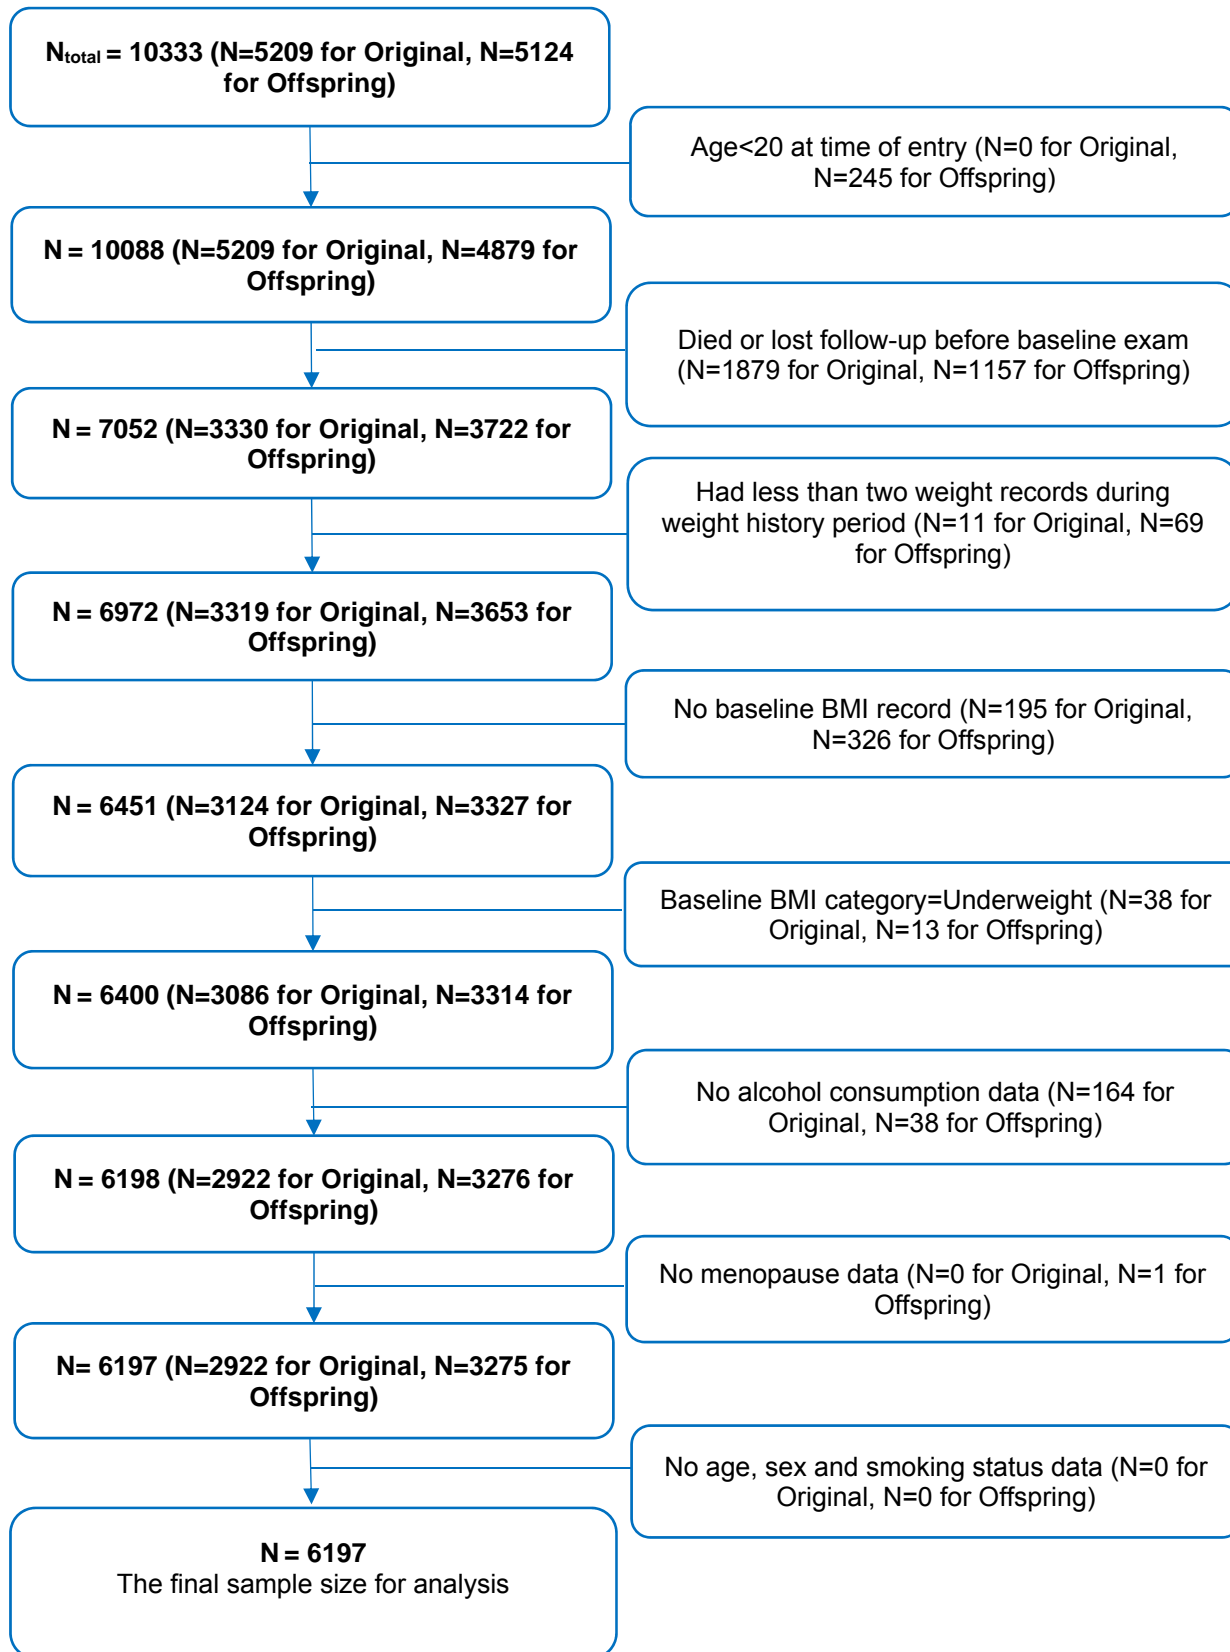

**eFigure 2.** Hazard Ratios for Categories of Maximum BMI With 24 Years of Weight History and Baseline BMI Among Both All Individuals and Never Smokers

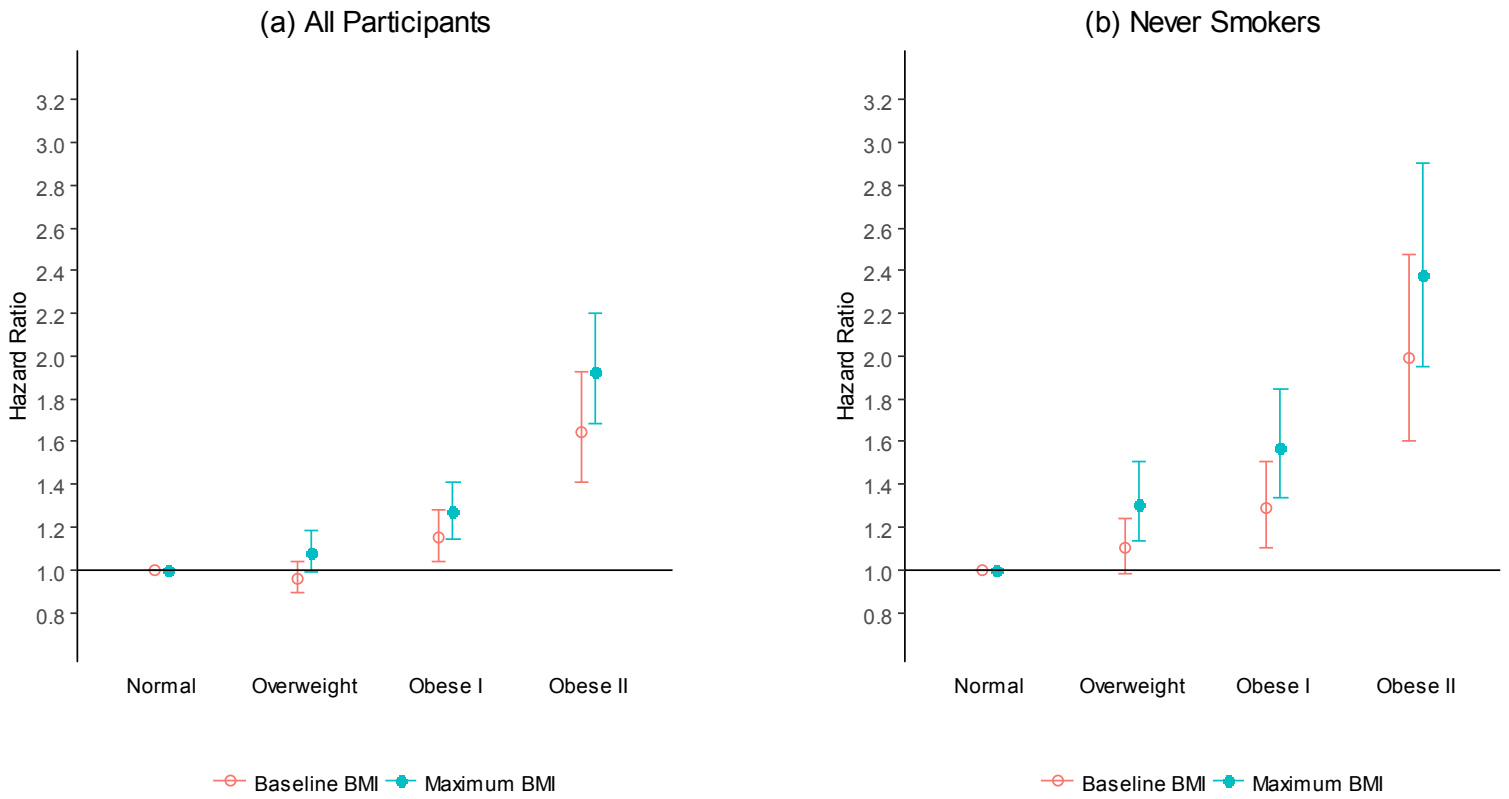

**eTable 1.** Characteristics of Prior Conditions Among BMI Categories

| Maximum / Baseline BMI categories |                     | All  |       | Prior CVD |      |     |      | Prior cancer |      |     |      |
|-----------------------------------|---------------------|------|-------|-----------|------|-----|------|--------------|------|-----|------|
|                                   |                     |      |       | No        |      | Yes |      | No           |      | Yes |      |
|                                   |                     | N    | %     | N         | %    | N   | %    | N            | %    | N   | %    |
| <b>All</b>                        |                     | 6197 | 100   | 5765      | 93.0 | 432 | 7.0  | 5763         | 93.0 | 434 | 7.0  |
| <b>Maximum BMI</b>                | <b>Baseline BMI</b> |      |       |           |      |     |      |              |      |     |      |
| Normal                            | Normal              | 1404 | 100.0 | 1339      | 95.4 | 65  | 4.6  | 1309         | 93.2 | 95  | 6.8  |
| Overweight                        | Normal              | 642  | 100.0 | 579       | 90.2 | 63  | 9.8  | 576          | 89.7 | 66  | 10.3 |
| Overweight                        | Overweight          | 2266 | 100.0 | 2130      | 94.0 | 136 | 6.0  | 2107         | 93.0 | 159 | 7.0  |
| Obese                             | Normal              | 33   | 100.0 | 28        | 84.9 | 5   | 15.2 | 32           | 97.0 | 1   | 3.0  |
| Obese                             | Overweight          | 423  | 100.0 | 371       | 87.7 | 52  | 12.3 | 388          | 91.7 | 35  | 8.3  |
| Obese                             | Obese               | 1429 | 100.0 | 1318      | 92.2 | 111 | 7.8  | 1351         | 94.5 | 78  | 5.5  |

BMI categories: Normal (18.5-24.9 kg/m<sup>2</sup>), Overweight (25.0-29.9 kg/m<sup>2</sup>), Obese (≥30.0 kg/m<sup>2</sup>)

**eTable 2.** Analysis of Trends in the Mortality Risks Between FHS Original and Offspring Cohorts for Overweight and Obesity Categories of Maximum BMI

| Strata                                                                                                                                                                                                                                                                                                                                                                                                                                                                                                                                                 | Overweight       | Obese I          | Obese II         |
|--------------------------------------------------------------------------------------------------------------------------------------------------------------------------------------------------------------------------------------------------------------------------------------------------------------------------------------------------------------------------------------------------------------------------------------------------------------------------------------------------------------------------------------------------------|------------------|------------------|------------------|
| <b>All Individuals</b>                                                                                                                                                                                                                                                                                                                                                                                                                                                                                                                                 |                  |                  |                  |
| Original                                                                                                                                                                                                                                                                                                                                                                                                                                                                                                                                               | 1 (Reference)    | 1 (Reference)    | 1 (Reference)    |
| Offspring <sup>a</sup>                                                                                                                                                                                                                                                                                                                                                                                                                                                                                                                                 | 0.81 (0.66,0.99) | 0.72 (0.57,0.91) | 0.89 (0.67,1.18) |
|                                                                                                                                                                                                                                                                                                                                                                                                                                                                                                                                                        |                  |                  |                  |
| Male                                                                                                                                                                                                                                                                                                                                                                                                                                                                                                                                                   |                  |                  |                  |
| Original                                                                                                                                                                                                                                                                                                                                                                                                                                                                                                                                               | 1 (Reference)    | 1 (Reference)    | 1 (Reference)    |
| Offspring                                                                                                                                                                                                                                                                                                                                                                                                                                                                                                                                              | 0.70 (0.50,0.97) | 0.55 (0.39,0.79) | 0.72 (0.45,1.15) |
|                                                                                                                                                                                                                                                                                                                                                                                                                                                                                                                                                        |                  |                  |                  |
| Female                                                                                                                                                                                                                                                                                                                                                                                                                                                                                                                                                 |                  |                  |                  |
| Original                                                                                                                                                                                                                                                                                                                                                                                                                                                                                                                                               | 1 (Reference)    | 1 (Reference)    | 1 (Reference)    |
| Offspring                                                                                                                                                                                                                                                                                                                                                                                                                                                                                                                                              | 0.82 (0.62,1.09) | 0.86 (0.62,1.18) | 0.92 (0.64,1.32) |
|                                                                                                                                                                                                                                                                                                                                                                                                                                                                                                                                                        |                  |                  |                  |
| <b>Never Smokers</b>                                                                                                                                                                                                                                                                                                                                                                                                                                                                                                                                   |                  |                  |                  |
| Original                                                                                                                                                                                                                                                                                                                                                                                                                                                                                                                                               | 1 (Reference)    | 1 (Reference)    | 1 (Reference)    |
| Offspring                                                                                                                                                                                                                                                                                                                                                                                                                                                                                                                                              | 0.81 (0.59,1.11) | 0.77 (0.54,1.09) | 0.97 (0.64,1.46) |
|                                                                                                                                                                                                                                                                                                                                                                                                                                                                                                                                                        |                  |                  |                  |
| Male                                                                                                                                                                                                                                                                                                                                                                                                                                                                                                                                                   |                  |                  |                  |
| Original                                                                                                                                                                                                                                                                                                                                                                                                                                                                                                                                               | 1 (Reference)    | 1 (Reference)    | 1 (Reference)    |
| Offspring                                                                                                                                                                                                                                                                                                                                                                                                                                                                                                                                              | 0.64 (0.31,1.12) | 0.56 (0.30,1.04) | 0.73 (0.34,1.57) |
|                                                                                                                                                                                                                                                                                                                                                                                                                                                                                                                                                        |                  |                  |                  |
| Female                                                                                                                                                                                                                                                                                                                                                                                                                                                                                                                                                 |                  |                  |                  |
| Original                                                                                                                                                                                                                                                                                                                                                                                                                                                                                                                                               | 1 (Reference)    | 1 (Reference)    | 1 (Reference)    |
| Offspring                                                                                                                                                                                                                                                                                                                                                                                                                                                                                                                                              | 0.80 (0.53,1.21) | 0.84 (0.53,1.33) | 0.95 (0.57,1.58) |
|                                                                                                                                                                                                                                                                                                                                                                                                                                                                                                                                                        |                  |                  |                  |
| <sup>a</sup> : Multivariable model- including maximum BMI category, cohort, interaction term of maximum BMI category and cohort, together with other covariates (age at baseline, sex (if appropriate), smoking status (if appropriate), alcohol intake, menopause status (if appropriate), duration between exam of reaching maximum BMI and baseline exam) in the model<br>BMI categories: Normal (18.5-24.9 kg/m <sup>2</sup> ), Overweight (25.0-29.9 kg/m <sup>2</sup> ), Obese I(30.0-34.9 kg/m <sup>2</sup> ), Obese II(≥35 kg/m <sup>2</sup> ) |                  |                  |                  |

**eTable 3.** Hazard Ratios for All-Cause Mortality in the FHS Original and Offspring Cohorts for Maximum BMI Categories With 24 Years of Weight History, Stratified by Smoking Status, Sex, and Cohort

| Strata                                                                                                                                                                                                                                                                                                                                                                                                                                                                                                                                                   | Original Cohort |                  |                  |                  | Offspring Cohort |                  |                  |                  |
|----------------------------------------------------------------------------------------------------------------------------------------------------------------------------------------------------------------------------------------------------------------------------------------------------------------------------------------------------------------------------------------------------------------------------------------------------------------------------------------------------------------------------------------------------------|-----------------|------------------|------------------|------------------|------------------|------------------|------------------|------------------|
|                                                                                                                                                                                                                                                                                                                                                                                                                                                                                                                                                          | Normal          | Overweight       | Obese I          | Obese II         | Normal           | Overweight       | Obese I          | Obese II         |
| <b>All Individuals</b>                                                                                                                                                                                                                                                                                                                                                                                                                                                                                                                                   |                 |                  |                  |                  |                  |                  |                  |                  |
| Event (n)                                                                                                                                                                                                                                                                                                                                                                                                                                                                                                                                                | 532             | 1316             | 542              | 186              | 178              | 376              | 221              | 127              |
| Multivariable HR (95% CI) <sup>a</sup>                                                                                                                                                                                                                                                                                                                                                                                                                                                                                                                   | 1 (Reference)   | 1.14 (1.03,1.26) | 1.37 (1.21,1.54) | 1.91 (1.61,2.26) | 1 (Reference)    | 0.91 (0.75,1.09) | 0.98 (0.80,1.20) | 1.80 (1.43,2.28) |
| Male                                                                                                                                                                                                                                                                                                                                                                                                                                                                                                                                                     |                 |                  |                  |                  |                  |                  |                  |                  |
| Event (n)                                                                                                                                                                                                                                                                                                                                                                                                                                                                                                                                                | 151             | 671              | 280              | 56               | 63               | 252              | 138              | 60               |
| Multivariable HR (95% CI)                                                                                                                                                                                                                                                                                                                                                                                                                                                                                                                                | 1 (Reference)   | 1.25 (1.05,1.50) | 1.58 (1.30,1.94) | 2.43 (1.78,3.32) | 1 (Reference)    | 0.89 (0.68,1.18) | 0.91 (0.67,1.24) | 2.00 (1.39,2.88) |
| Female                                                                                                                                                                                                                                                                                                                                                                                                                                                                                                                                                   |                 |                  |                  |                  |                  |                  |                  |                  |
| Event (n)                                                                                                                                                                                                                                                                                                                                                                                                                                                                                                                                                | 381             | 645              | 262              | 130              | 115              | 124              | 83               | 67               |
| Multivariable HR (95% CI)                                                                                                                                                                                                                                                                                                                                                                                                                                                                                                                                | 1 (Reference)   | 1.10 (0.97,1.25) | 1.28 (1.09,1.50) | 1.78 (1.46,2.18) | 1 (Reference)    | 0.90 (0.69,1.16) | 1.08 (0.81,1.44) | 1.64 (1.21,2.23) |
| <b>Never Smokers</b>                                                                                                                                                                                                                                                                                                                                                                                                                                                                                                                                     |                 |                  |                  |                  |                  |                  |                  |                  |
| Event (n)                                                                                                                                                                                                                                                                                                                                                                                                                                                                                                                                                | 179             | 548              | 249              | 96               | 79               | 209              | 106              | 68               |
| Multivariable HR (95% CI)                                                                                                                                                                                                                                                                                                                                                                                                                                                                                                                                | 1 (Reference)   | 1.39 (1.17,1.65) | 1.69 (1.40,2.06) | 2.30 (1.79,2.96) | 1 (Reference)    | 1.12 (0.86,1.46) | 1.33 (0.98,1.80) | 2.45 (1.76,3.41) |
| Male                                                                                                                                                                                                                                                                                                                                                                                                                                                                                                                                                     |                 |                  |                  |                  |                  |                  |                  |                  |
| Event (n)                                                                                                                                                                                                                                                                                                                                                                                                                                                                                                                                                | 33              | 217              | 88               | 21               | 24               | 142              | 65               | 32               |
| Multivariable HR (95% CI)                                                                                                                                                                                                                                                                                                                                                                                                                                                                                                                                | 1 (Reference)   | 2.05 (1.42,2.97) | 2.59 (1.72,3.88) | 3.83 (2.19,6.71) | 1 (Reference)    | 1.35 (0.87,2.09) | 1.55 (0.96,2.50) | 3.34 (1.94,5.74) |
| Female                                                                                                                                                                                                                                                                                                                                                                                                                                                                                                                                                   |                 |                  |                  |                  |                  |                  |                  |                  |
| Event (n)                                                                                                                                                                                                                                                                                                                                                                                                                                                                                                                                                | 146             | 331              | 161              | 75               | 55               | 67               | 41               | 36               |
| Multivariable HR (95% CI)                                                                                                                                                                                                                                                                                                                                                                                                                                                                                                                                | 1 (Reference)   | 1.24 (1.02,1.50) | 1.50 (1.20,1.88) | 2.01 (1.52,2.67) | 1 (Reference)    | 0.98 (0.68,1.42) | 1.25 (0.83,1.89) | 1.97 (1.28,3.05) |
| <sup>a</sup> : Multivariable model- including maximum BMI category and other covariates (age at baseline, sex (if appropriate), smoking status (if appropriate), alcohol intake, menopause status (if appropriate), duration between exam of reaching maxbmi and baseline exam) in the model<br>BMI categories: Normal (18.5-24.9 kg/m <sup>2</sup> ), Overweight (25.0-29.9 kg/m <sup>2</sup> ), Obese I(30.0-34.9 kg/m <sup>2</sup> ), Obese II(≥35 kg/m <sup>2</sup> )<br>Abbreviations: HR=Hazard Ratio, p-yrs=person-years, CI= Confidence Interval |                 |                  |                  |                  |                  |                  |                  |                  |

**eTable 4.** Hazard Ratios for All-Cause Mortality in the FHS Original and Offspring Cohorts for Maximum BMI Categories With 24 Years of Weight History and BMI Categories at Baseline Exam, Stratified by Age of 70 at Baseline

| Strata                                                                                                                                                                                                                                                                                                                                                                                                                                                                                                                                                          | Maximum BMI Category |                  |                  |                  | Baseline BMI Category |                  |                  |                  |
|-----------------------------------------------------------------------------------------------------------------------------------------------------------------------------------------------------------------------------------------------------------------------------------------------------------------------------------------------------------------------------------------------------------------------------------------------------------------------------------------------------------------------------------------------------------------|----------------------|------------------|------------------|------------------|-----------------------|------------------|------------------|------------------|
|                                                                                                                                                                                                                                                                                                                                                                                                                                                                                                                                                                 | Normal               | Overweight       | Obese I          | Obese II         | Normal                | Overweight       | Obese I          | Obese II         |
| <b>All Individuals</b>                                                                                                                                                                                                                                                                                                                                                                                                                                                                                                                                          |                      |                  |                  |                  |                       |                  |                  |                  |
| Age < 70 years                                                                                                                                                                                                                                                                                                                                                                                                                                                                                                                                                  |                      |                  |                  |                  |                       |                  |                  |                  |
| Event (n)                                                                                                                                                                                                                                                                                                                                                                                                                                                                                                                                                       | 519                  | 1088             | 492              | 219              | 796                   | 1004             | 372              | 146              |
| Multivariable HR (95% CI)                                                                                                                                                                                                                                                                                                                                                                                                                                                                                                                                       | 1 (Reference)        | 1.00 (0.90,1.11) | 1.20 (1.06,1.37) | 1.92 (1.63,2.25) | 1 (Reference)         | 0.96 (0.88,1.06) | 1.23 (1.08,1.40) | 1.95 (1.62,2.34) |
| Age ≥ 70 years                                                                                                                                                                                                                                                                                                                                                                                                                                                                                                                                                  |                      |                  |                  |                  |                       |                  |                  |                  |
| Event (n)                                                                                                                                                                                                                                                                                                                                                                                                                                                                                                                                                       | 191                  | 604              | 271              | 94               | 414                   | 527              | 174              | 45               |
| Multivariable HR (95% CI)                                                                                                                                                                                                                                                                                                                                                                                                                                                                                                                                       | 1 (Reference)        | 1.32 (1.12,1.56) | 1.48 (1.22,1.78) | 2.06 (1.60,2.65) | 1 (Reference)         | 1.10 (0.96,1.25) | 1.19 (0.99,1.44) | 1.51 (1.10,2.07) |
| <b>Never Smokers</b>                                                                                                                                                                                                                                                                                                                                                                                                                                                                                                                                            |                      |                  |                  |                  |                       |                  |                  |                  |
| Age < 70 years                                                                                                                                                                                                                                                                                                                                                                                                                                                                                                                                                  |                      |                  |                  |                  |                       |                  |                  |                  |
| Event (n)                                                                                                                                                                                                                                                                                                                                                                                                                                                                                                                                                       | 158                  | 403              | 203              | 101              | 252                   | 390              | 148              | 75               |
| Multivariable HR (95% CI)                                                                                                                                                                                                                                                                                                                                                                                                                                                                                                                                       | 1 (Reference)        | 1.22 (1.01,1.47) | 1.59 (1.29,1.96) | 2.48 (1.93,3.20) | 1 (Reference)         | 1.21 (1.03,1.42) | 1.48 (1.20,1.82) | 2.47 (1.89,3.23) |
| Age ≥ 70 years                                                                                                                                                                                                                                                                                                                                                                                                                                                                                                                                                  |                      |                  |                  |                  |                       |                  |                  |                  |
| Event (n)                                                                                                                                                                                                                                                                                                                                                                                                                                                                                                                                                       | 100                  | 354              | 152              | 63               | 239                   | 300              | 101              | 29               |
| Multivariable HR (95% CI)                                                                                                                                                                                                                                                                                                                                                                                                                                                                                                                                       | 1 (Reference)        | 1.43 (1.14,1.80) | 1.54 (1.19,1.99) | 2.27 (1.65,3.12) | 1 (Reference)         | 1.08 (0.91,1.29) | 1.13 (0.89,1.44) | 1.70 (1.14,2.53) |
| <sup>a</sup> : Multivariable model- including maximum BMI category (or Baseline BMI category) and other covariates (age at baseline, sex (if appropriate), smoking status (if appropriate), alcohol intake, menopause status (if appropriate), duration between exam of reaching maxbmi and baseline exam) in the model<br>BMI categories: Normal (18.5-24.9 kg/m <sup>2</sup> ), Overweight (25.0-29.9 kg/m <sup>2</sup> ), Obese I(30.0-34.9 kg/m <sup>2</sup> ), Obese II(≥35 kg/m <sup>2</sup> )<br>Abbreviations: HR=Hazard Ratio, CI= Confidence Interval |                      |                  |                  |                  |                       |                  |                  |                  |

**eTable 5.** Hazard Ratios for All-Cause Mortality in the FHS Original and Offspring Cohorts for Maximum BMI Categories With 24 Years of Weight History, Stratified by Smoking Status and Sex, Further Adjusting for BMI at Baseline Exam as Sensitivity Analyses

| Strata                                                                                                                                                                                                                                                                                                                                                                                                            | Maximum BMI Category                     |                                              |                                           |                                        |
|-------------------------------------------------------------------------------------------------------------------------------------------------------------------------------------------------------------------------------------------------------------------------------------------------------------------------------------------------------------------------------------------------------------------|------------------------------------------|----------------------------------------------|-------------------------------------------|----------------------------------------|
|                                                                                                                                                                                                                                                                                                                                                                                                                   | Normal<br>(18.5-24.9 kg/m <sup>2</sup> ) | Overweight<br>(25.0-29.9 kg/m <sup>2</sup> ) | Obese I<br>(30.0-34.9 kg/m <sup>2</sup> ) | Obese II<br>(≥35.0 kg/m <sup>2</sup> ) |
| <b>All Individuals</b>                                                                                                                                                                                                                                                                                                                                                                                            |                                          |                                              |                                           |                                        |
| Event (n)                                                                                                                                                                                                                                                                                                                                                                                                         | 710                                      | 1692                                         | 763                                       | 313                                    |
| 1,000 p-yrs                                                                                                                                                                                                                                                                                                                                                                                                       | 25.42                                    | 49.63                                        | 21.88                                     | 8.28                                   |
| Multivariable HR (95% CI) <sup>a</sup>                                                                                                                                                                                                                                                                                                                                                                            | 1 (Reference)                            | 1.203 (1.08,1.34)                            | 1.585 (1.345,1.867)                       | 2.839 (2.195,3.671)                    |
|                                                                                                                                                                                                                                                                                                                                                                                                                   |                                          |                                              |                                           |                                        |
| <b>Male</b>                                                                                                                                                                                                                                                                                                                                                                                                       |                                          |                                              |                                           |                                        |
| Event (n)                                                                                                                                                                                                                                                                                                                                                                                                         | 214                                      | 923                                          | 418                                       | 116                                    |
| 1,000 p-yrs                                                                                                                                                                                                                                                                                                                                                                                                       | 5.55                                     | 23.93                                        | 10.91                                     | 2.86                                   |
| Multivariable HR (95% CI)                                                                                                                                                                                                                                                                                                                                                                                         | 1 (Reference)                            | 1.267 (1.061,1.514)                          | 1.666 (1.282,2.165)                       | 3.303 (2.186,4.989)                    |
|                                                                                                                                                                                                                                                                                                                                                                                                                   |                                          |                                              |                                           |                                        |
| <b>Female</b>                                                                                                                                                                                                                                                                                                                                                                                                     |                                          |                                              |                                           |                                        |
| Event (n)                                                                                                                                                                                                                                                                                                                                                                                                         | 496                                      | 769                                          | 345                                       | 197                                    |
| 1,000 p-yrs                                                                                                                                                                                                                                                                                                                                                                                                       | 19.87                                    | 25.70                                        | 10.97                                     | 5.43                                   |
| Multivariable HR (95% CI)                                                                                                                                                                                                                                                                                                                                                                                         | 1 (Reference)                            | 1.178 (1.025,1.353)                          | 1.57 (1.265,1.948)                        | 2.694 (1.931,3.758)                    |
|                                                                                                                                                                                                                                                                                                                                                                                                                   |                                          |                                              |                                           |                                        |
| <b>Never Smokers</b>                                                                                                                                                                                                                                                                                                                                                                                              |                                          |                                              |                                           |                                        |
| Event (n)                                                                                                                                                                                                                                                                                                                                                                                                         | 258                                      | 757                                          | 355                                       | 164                                    |
| 1,000 p-yrs                                                                                                                                                                                                                                                                                                                                                                                                       | 12.42                                    | 24.87                                        | 10.79                                     | 4.47                                   |
| Multivariable HR (95% CI)                                                                                                                                                                                                                                                                                                                                                                                         | 1 (Reference)                            | 1.483 (1.252,1.756)                          | 2.052 (1.598,2.634)                       | 3.78 (2.575,5.549)                     |
|                                                                                                                                                                                                                                                                                                                                                                                                                   |                                          |                                              |                                           |                                        |
| <b>Male</b>                                                                                                                                                                                                                                                                                                                                                                                                       |                                          |                                              |                                           |                                        |
| Event (n)                                                                                                                                                                                                                                                                                                                                                                                                         | 57                                       | 359                                          | 153                                       | 53                                     |
| 1,000 p-yrs                                                                                                                                                                                                                                                                                                                                                                                                       | 2.59                                     | 10.98                                        | 4.45                                      | 1.37                                   |
| Multivariable HR (95% CI)                                                                                                                                                                                                                                                                                                                                                                                         | 1 (Reference)                            | 1.787 (1.302,2.454)                          | 2.153 (1.382,3.354)                       | 4.008 (2.063,7.785)                    |
|                                                                                                                                                                                                                                                                                                                                                                                                                   |                                          |                                              |                                           |                                        |
| <b>Female</b>                                                                                                                                                                                                                                                                                                                                                                                                     |                                          |                                              |                                           |                                        |
| Event (n)                                                                                                                                                                                                                                                                                                                                                                                                         | 201                                      | 398                                          | 202                                       | 111                                    |
| 1,000 p-yrs                                                                                                                                                                                                                                                                                                                                                                                                       | 9.84                                     | 13.89                                        | 6.34                                      | 3.10                                   |
| Multivariable HR (95% CI)                                                                                                                                                                                                                                                                                                                                                                                         | 1 (Reference)                            | 1.382 (1.125,1.697)                          | 2.044 (1.498,2.789)                       | 3.771 (2.343,6.068)                    |
|                                                                                                                                                                                                                                                                                                                                                                                                                   |                                          |                                              |                                           |                                        |
| <sup>a</sup> : Multivariable model- including maximum BMI category and other covariates (age at baseline, cohort, sex (if appropriate), smoking status (if appropriate), alcohol intake, menopause status (if appropriate), duration between exam of reaching maximum BMI and baseline exam and BMI at baseline exam) in the model<br>Abbreviations: HR=Hazard Ratio, p-yrs=person-years, CI= Confidence Interval |                                          |                                              |                                           |                                        |



**eTable 6.** Sample Size and Hazard Ratios for All-Cause Mortality for FHS Original and Offspring Cohorts Stratified by Maximum BMI and Baseline BMI Among All Individuals. (Obese I and Obese II were combined as Obese in this specific analysis due to small event size)

| Sample Size / Hazard Ratios<br>(95% CI) |            | Maximum BMI          |                          |                          |
|-----------------------------------------|------------|----------------------|--------------------------|--------------------------|
|                                         |            | Normal               | Overweight               | Obese                    |
| Baseline BMI                            | Normal     | 1404 / 1 (Reference) | 642 / 1.22 (1.09, 1.38)  | 33 / 1.80 (1.23, 2.64)   |
|                                         | Overweight |                      | 2266 / 1.04 (0.94, 1.14) | 423 / 1.33 (1.16, 1.53)  |
|                                         | Obese      |                      |                          | 1429 / 1.32 (1.18, 1.48) |

BMI categories: Normal (18.5-24.9 kg/m<sup>2</sup>), Overweight (25.0-29.9 kg/m<sup>2</sup>), Obese (≥30.0 kg/m<sup>2</sup>)

**eTable 7.** Hazard Ratios for Cause-Specific Mortality in the FHS Original and Offspring Cohorts for Maximum BMI Categories With 24 Years of Weight History

| Strata                                                                                                                                                                                                                                                                                                                                                                                                                                                                | Normal        | Overweight       | Obese I          | Obese II         |
|-----------------------------------------------------------------------------------------------------------------------------------------------------------------------------------------------------------------------------------------------------------------------------------------------------------------------------------------------------------------------------------------------------------------------------------------------------------------------|---------------|------------------|------------------|------------------|
| <b>All-Cause mortality</b>                                                                                                                                                                                                                                                                                                                                                                                                                                            |               |                  |                  |                  |
| Event (n) /1,000 p-yrs                                                                                                                                                                                                                                                                                                                                                                                                                                                | 710 / 25.42   | 1692 / 49.63     | 763 / 21.88      | 313 / 8.28       |
| Multivariable HR (95% CI) <sup>a</sup>                                                                                                                                                                                                                                                                                                                                                                                                                                | 1 (Reference) | 1.08 (0.99,1.18) | 1.27 (1.14,1.41) | 1.93 (1.68,2.20) |
|                                                                                                                                                                                                                                                                                                                                                                                                                                                                       |               |                  |                  |                  |
| <b>CVD</b>                                                                                                                                                                                                                                                                                                                                                                                                                                                            |               |                  |                  |                  |
| Event (n)                                                                                                                                                                                                                                                                                                                                                                                                                                                             | 173           | 501              | 257              | 103              |
| Multivariable HR (95% CI)                                                                                                                                                                                                                                                                                                                                                                                                                                             | 1 (Reference) | 1.22 (1.02,1.45) | 1.66 (1.36,2.02) | 2.56 (2.00,3.28) |
|                                                                                                                                                                                                                                                                                                                                                                                                                                                                       |               |                  |                  |                  |
| <b>Cancer</b>                                                                                                                                                                                                                                                                                                                                                                                                                                                         |               |                  |                  |                  |
| Event (n)                                                                                                                                                                                                                                                                                                                                                                                                                                                             | 189           | 442              | 180              | 70               |
| Multivariable HR (95% CI)                                                                                                                                                                                                                                                                                                                                                                                                                                             | 1 (Reference) | 1.02 (0.85,1.21) | 1.02 (0.82,1.25) | 1.39 (1.06,1.84) |
|                                                                                                                                                                                                                                                                                                                                                                                                                                                                       |               |                  |                  |                  |
| <b>Other Causes</b>                                                                                                                                                                                                                                                                                                                                                                                                                                                   |               |                  |                  |                  |
| Event (n)                                                                                                                                                                                                                                                                                                                                                                                                                                                             | 348           | 749              | 326              | 140              |
| Multivariable HR (95% CI)                                                                                                                                                                                                                                                                                                                                                                                                                                             | 1 (Reference) | 1.05 (0.92,1.19) | 1.21 (1.03,1.41) | 1.93 (1.58,2.35) |
|                                                                                                                                                                                                                                                                                                                                                                                                                                                                       |               |                  |                  |                  |
| <sup>a</sup> : Multivariable model- including maximum BMI category and other covariates (age at baseline, cohort, sex (if appropriate), smoking status, alcohol intake, menopause status (if appropriate), duration between exam of reaching maximum BMI and baseline exam) in the model<br>BMI categories: Normal (18.5-24.9 kg/m <sup>2</sup> ), Overweight (25.0-29.9 kg/m <sup>2</sup> ), Obese I(30.0-34.9 kg/m <sup>2</sup> ), Obese II(≥35 kg/m <sup>2</sup> ) |               |                  |                  |                  |
